# Supplementary material for: Trends in Radiation Therapy among Cancer Survivors in the United States, 2000–2030
Source: Oxford University Press journal article supplement (doi:10.1158/1055-9965.epi-16-1023), 2017-01-17
Supplement: 10559965epi161023-sup-176116_1_supp_3816408_njjn1h.docx [file 10559965epi161023-sup-176116_1_supp_3816408_njjn1h.docx]

Our primary analysis focused on radiation-treated cancer survivors alive at least 5 years from diagnosis. Supplemental Table S1 demonstrates the primary analysis where we vary the required length of survivorship from 1 to 10 years, focusing on the nine most common cancers.

**Supplementary Table S1.** Number of radiation-treated survivors alive at 1, 3, 5, and 10 years after diagnosis.

|  | Survivor years | Radiation-treated survivors in thousands (% of all site-specific cancer survivors) | | | | | |
| --- | --- | --- | --- | --- | --- | --- | --- |
| Site | 2000 | 2010 | 2016 | 2020 | 2030 |
| Breast | 1 | 694.7 (35) | 1286.5 (50) | 1648.9 (55) | 1899.5 (57) | 2524.3 (60) |
| 3 | 527.9 (32) | 1104.6 (49) | 1440.5 (55) | 1675.3 (57) | 2260.4 (60) |
| 5 | 396.9 (29) | 933.9 (48) | 1247.1 (54) | 1465.5 (57) | 2011 (60) |
| 10 | 180.2 (21) | 546 (42) | 828.5 (52) | 1004.6 (56) | 1458.1 (61) |
| Prostate | 1 | 491.9 (33) | 851.5 (36) | 904.1 (34) | 887.5 (32) | 725.6 (26) |
| 3 | 361.4 (32) | 715.1 (37) | 806.2 (35) | 805.6 (33) | 678.2 (27) |
| 5 | 265.9 (31) | 568.5 (36) | 712.5 (35) | 720.5 (33) | 627.2 (27) |
| 10 | 83.4 (31) | 268.9 (32) | 427.2 (36) | 501.8 (35) | 488.3 (29) |
| Head and neck | 1 | 161.1 (51) | 197.7 (56) | 234.6 (57) | 262.6 (58) | 338 (57) |
| 3 | 130 (50) | 159.5 (54) | 192.5 (57) | 217.1 (57) | 285.8 (56) |
| 5 | 104.6 (47) | 129.6 (53) | 157.5 (55) | 179.8 (56) | 241.8 (56) |
| 10 | 62 (43) | 77.7 (49) | 94.8 (52) | 110.6 (54) | 157 (54) |
| Lymphoma | 1 | 177 (38) | 218.2 (33) | 238.7 (30) | 250.1 (28) | 268.1 (23) |
| 3 | 154.1 (40) | 196.4 (35) | 218.6 (31) | 230.7 (29) | 250.8 (24) |
| 5 | 135.3 (42) | 176.3 (37) | 199.5 (33) | 211.9 (31) | 233.7 (25) |
| 10 | 100.3 (48) | 129.6 (42) | 153.3 (38) | 168 (35) | 193 (29) |
| Uterus | 1 | 177.4 (33) | 149 (26) | 155.4 (24) | 169.2 (23) | 222.8 (22) |
| 3 | 162.6 (34) | 131.4 (27) | 133.6 (24) | 144.5 (23) | 191.4 (22) |
| 5 | 150.1 (35) | 115.9 (27) | 115.2 (24) | 123.3 (23) | 163.6 (21) |
| 10 | 123 (37) | 85.5 (28) | 79.6 (24) | 81.9 (22) | 107.5 (21) |
| Rectal | 1 | 75.3 (27) | 117.4 (35) | 144.8 (38) | 162.9 (40) | 207.1 (43) |
| 3 | 55.1 (25) | 95.4 (34) | 121.6 (37) | 139.3 (39) | 182.5 (42) |
| 5 | 41.2 (23) | 76.1 (32) | 101.2 (37) | 118.2 (39) | 160 (42) |
| 10 | 20.2 (18) | 41.9 (29) | 60.3 (34) | 75 (37) | 111.4 (40) |
| Lung | 1 | 76 (23) | 93.5 (24) | 110.8 (27) | 126.9 (29) | 185.8 (37) |
| 3 | 39.6 (17) | 55.1 (20) | 68.3 (22) | 80 (25) | 124.1 (33) |
| 5 | 26.5 (16) | 38.7 (18) | 48.6 (21) | 57.2 (23) | 89.3 (31) |
| 10 | 14 (17) | 21.6 (20) | 27.1 (22) | 31.6 (24) | 47 (30) |
| Brain and other nervous system | 1 | 53.2 (57) | 62.1 (48) | 69.1 (45) | 74.9 (43) | 94.3 (40) |
| 3 | 44.9 (57) | 52 (47) | 57.7 (43) | 62.3 (41) | 78 (38) |
| 5 | 39.9 (59) | 46.6 (48) | 51.5 (43) | 55.4 (41) | 68.5 (37) |
| 10 | 31 (65) | 36.9 (52) | 41.1 (46) | 44.1 (43) | 53.4 (38) |
| Cervix | 1 | 74.6 (32) | 70.3 (30) | 72.5 (31) | 75.8 (31) | 89.6 (35) |
| 3 | 67.5 (31) | 62.9 (29) | 64.4 (29) | 67.2 (30) | 79.4 (33) |
| 5 | 61.1 (30) | 56.9 (28) | 57.8 (28) | 60 (29) | 70.7 (32) |
| 10 | 48.7 (30) | 44.3 (26) | 44.4 (26) | 45.4 (26) | 52.9 (28) |
| All sites | 1 | 2319.9 (26) | 3460.7 (29) | 4047.2 (29) | 4423.2 (29) | 5349.6 (28) |
| 3 | 1831.6 (25) | 2925.8 (29) | 3504.4 (29) | 3861.6 (29) | 4712 (28) |
| 5 | 1477 (24) | 2454.5 (28) | 3045.1 (29) | 3378.4 (29) | 4166 (28) |
| 10 | 858.9 (23) | 1487.2 (27) | 2025.3 (29) | 2355.9 (29) | 3029.9 (28) |
