# Supplementary material for: Trends in Radiation Therapy among Cancer Survivors in the United States, 2000–2030
Source: Oxford University Press journal article supplement (doi:10.1158/1055-9965.epi-16-1023), 2017-01-17
Supplement: 10559965epi161023-sup-176116_1_supp_3816409_3jjn1h.docx [file 10559965epi161023-sup-176116_1_supp_3816409_3jjn1h.docx]

Our primary analysis assumed that projected incidence and survival trends would continue based on historical trends. Supplemental Table S2 demonstrates the number of radiation-treated cancer survivors when assuming constant cancer incidence, constant relative survival, and both constant incidence and constant relative survival.

**Supplementary Table S2.** Number of cancer survivors who received radiation therapy by cancer site.

|  | Number of radiation-treated cancer survivors, in thousands (% of all site-specific cancer survivors) | | | | | | | | | | |
| --- | --- | --- | --- | --- | --- | --- | --- | --- | --- | --- | --- |
|  | **Primary analysis** | |  | **Sensitivity analyses** | | | | | | | |
|  | **Method:**  Trend incidence,  trend survival | |  | **Method:**  Trend incidence,  constant survival | |  | **Method:**  Constant incidence,  trend survival | |  | **Method:**  Constant incidence,  constant survival | |
| Site | **2020** | **2030** |  | **2020** | **2030** |  | **2020** | **2030** |  | **2020** | **2030** |
| All sites | 3378.4 (29) | 4166 (28) |  | 3375.1 (29) | 4077.4 (28) |  | 3400 (29) | 4467.1 (29) |  | 3396.3 (29) | 4367.8 (29) |
| Breast | 1465.5 (57) | 2011 (60) |  | 1464.9 (57) | 2005 (61) |  | 1465.2 (57) | 1994.3 (60) |  | 1464.3 (57) | 1987.5 (60) |
| Prostate | 720.5 (33) | 627.2 (27) |  | 720.5 (33) | 627.1 (27) |  | 738.5 (34) | 898.1 (32) |  | 738.5 (34) | 898 (32) |
| Head and neck | 179.8 (56) | 241.8 (56) |  | 180.1 (56) | 233.4 (57) |  | 180 (56) | 243.3 (55) |  | 180.2 (56) | 234.8 (56) |
| Lymphoma | 211.9 (31) | 233.7 (25) |  | 211.7 (31) | 230.3 (26) |  | 213.4 (31) | 257.1 (26) |  | 213.2 (31) | 252.6 (27) |
| Uterus | 123.3 (23) | 163.6 (21) |  | 123.3 (23) | 162.5 (21) |  | 123 (23) | 156 (22) |  | 123 (23) | 155.1 (22) |
| Rectal | 118.2 (39) | 160 (42) |  | 117.8 (39) | 152.1 (41) |  | 118.9 (39) | 172.2 (42) |  | 118.6 (38) | 163.1 (41) |
| Other | 99.7 (9) | 115.1 (7) |  | 99.4 (9) | 109 (7) |  | 100 (9) | 116.5 (8) |  | 99.8 (9) | 109.3 (7) |
| Lung | 57.2 (23) | 89.3 (31) |  | 56.4 (23) | 68.5 (26) |  | 58 (23) | 103.4 (29) |  | 57.1 (23) | 78.1 (24) |
| Cervix | 60 (29) | 70.7 (32) |  | 59.9 (29) | 67.7 (31) |  | 60 (29) | 71.3 (31) |  | 59.9 (29) | 68.1 (30) |
| Bones and soft tissues | 48.6 (32) | 69.1 (35) |  | 48.6 (32) | 66.6 (35) |  | 48.5 (32) | 65.8 (33) |  | 48.4 (31) | 63.7 (33) |
| Brain and other nervous system | 55.4 (41) | 68.5 (37) |  | 55.3 (41) | 64.5 (38) |  | 55.4 (41) | 68.3 (37) |  | 55.3 (41) | 64.3 (37) |
| Testis | 79.2 (34) | 67.4 (23) |  | 79.2 (34) | 67.4 (23) |  | 79.9 (34) | 75.4 (26) |  | 79.9 (34) | 75.4 (26) |
| Anus | 30.8 (81) | 49 (76) |  | 30.7 (81) | 52.4 (86) |  | 30.5 (81) | 42.6 (73) |  | 30.2 (81) | 45.2 (82) |
| Leukemia | 31.1 (10) | 36.2 (8) |  | 31 (10) | 34.5 (8) |  | 31.1 (10) | 34.8 (7) |  | 31 (10) | 33.6 (7) |
| Bladder and kidney | 19.1 (2) | 29.4 (3) |  | 18.8 (2) | 24.1 (2) |  | 19.1 (2) | 29 (3) |  | 18.8 (2) | 23.5 (2) |
| Myeloma | 15.8 (26) | 28.3 (24) |  | 15.6 (26) | 23 (23) |  | 16 (27) | 30.2 (29) |  | 15.7 (26) | 24.5 (27) |
| Stomach | 15.7 (24) | 28.3 (30) |  | 15.5 (24) | 22.5 (26) |  | 15.9 (24) | 30.7 (31) |  | 15.6 (24) | 24.3 (27) |
| Esophagus | 13.9 (55) | 27.4 (61) |  | 13.7 (55) | 21 (59) |  | 14 (54) | 27.9 (57) |  | 13.8 (54) | 21.4 (55) |
| Pancreas and hepatobiliary | 11.2 (8) | 21.8 (9) |  | 11 (8) | 16.8 (8) |  | 11.2 (9) | 21.5 (10) |  | 11 (8) | 16.6 (9) |
| Skin excluding basal or squamous | 11.3 (1) | 18.4 (2) |  | 11.6 (1) | 19.6 (2) |  | 11.3 (1) | 17 (1) |  | 11.6 (1) | 17.7 (2) |
| Colon | 10.2 (2) | 9.7 (1) |  | 10.1 (2) | 9.3 (1) |  | 10.3 (2) | 11.6 (1) |  | 10.3 (2) | 11 (1) |
